# Supplementary material for: Biochemical Analysis of the Role of Leucine-Rich Repeat Receptor-Like Kinases and the Carboxy-Terminus of Receptor Kinases in Regulating Kinase Activity in Arabidopsis thaliana and Brassica oleracea
Source: PubMed Central journal article supplement (PMC6017770; doi:10.3390/molecules23010236), 2018-01-22
Supplement: molecules-23-00236-s001.pdf [file molecules-23-00236-s001.pdf]

# Biochemical Analysis of the Role of Leucine-Rich Repeat Receptor-Like Kinases and the Carboxy-Terminus of Receptor Kinases in Regulating Kinase Activity in *Arabidopsis thaliana* and *Brassica oleracea*

Eun-Seok Oh <sup>1,†</sup>, Yeon Lee <sup>1,†</sup>, Won Byoung Chae <sup>2,†</sup>, Jana Jeevan Rameneni <sup>3</sup>, Yong-Soon Park <sup>1</sup>, Yong Pyo Lim <sup>3</sup> and Man-Ho Oh <sup>1,\*</sup>

<sup>1</sup> Department of Biological Sciences, College of Biological Sciences and Biotechnology, Chungnam National University, Daejeon 34134, Korea; oes0318@naver.com (E.-S.O.); yeonlee@cnu.ac.kr (Y.L.); yspark2005@gmail.com (Y.-S.P.)

<sup>2</sup> Vegetable Research Division, National Institute of Horticultural and Herbal Science, RDA, Wanju, Korea; chaeddang@korea.kr

<sup>3</sup> Department of Horticulture, College of Agriculture and Life Science, Chungnam National University, Daejeon, Korea; sajeevan7@gmail.com (J.J.R.); yplim@cnu.ac.kr (Y.P.L.)

\* Correspondence: manhooh@cnu.ac.kr; Tel.: +82-42-821-5497

† These authors contributed equally to this work.

**Table S1.** Summary of 43 LRR-RLKs cloned and investigated in *Brassica oleracea*.

| Given name | Locus of <i>B. oleracea</i> | Locus of <i>A. thaliana</i> | Symbol   | Full length CDS (bp) |
|------------|-----------------------------|-----------------------------|----------|----------------------|
| BoLRR5     | Bol033816                   | At4g33430                   | BAK1     | 1644                 |
| BoLRR10    | Bol016985                   | At3g49670                   | BAM2     | 2976                 |
| BoLRR11    | Bol021078                   | At1g08590                   | CLAVATA1 | 3060                 |
| BoLRR13    | Bol024340                   | At4g20270                   | BAM3-2   | 2535                 |
| BoLRR15    | Bol026354                   | At1g72300-1                 |          | 3264                 |
| BoLRR17    | Bol028337                   | At4g20270                   | BAM3-3   | 2904                 |
| BoLRR20    | Bol031960                   | At1g35710                   |          | 2751                 |
| BoLRR21    | Bol032005                   | At1g34110                   |          | 3297                 |
| BoLRR22    | Bol032343                   | At5g48940                   | RCH1     | 3384                 |
| BoLRR24    | Bol035223                   | At1g55610                   | BRL1     | 2280                 |
| BoLRR25    | Bol036776                   | At1g09970-3                 |          | 2907                 |
| BoLRR26    | Bol040029                   | At1g73080                   | PEPR1    | 2646                 |
| BoLRR27    | Bol040099                   | At1g34210                   | SERK2    | 1866                 |
| BoLRR30    | Bol025935                   | AT5G20480                   | EFR1-1   | 2685                 |
| BoLRR31    | Bol025932                   | AT5G20480                   | EFR1-2   | 2685                 |
| BoLRR32    | Bol032113                   | AT5G46330                   | FLS2     | 3531                 |
| BoLRR33    | Bol033102                   | AT5G48380                   | BIR1     | 1878                 |
| BoLRR35    | Bol015128                   | AT2G02220                   | PSKR1-2  | 2817                 |
| BoLRR36    | Bol020960                   | At3g46350                   |          | 2212                 |
| BoLRR38    | Bol003589                   | At1g72180-1                 |          | 2922                 |
| BoLRR39    | Bol040075                   | At1g72180-2                 |          | 2925                 |
| BoLRR40    | Bol040522                   | At1g79620                   |          | 2373                 |
| BoLRR41    | Bol001136                   | At2g01950                   | BRL2     | 3273                 |
| BoLRR44    | Bol008219                   | At2g31880                   | SOBIR1   | 1932                 |
| BoLRR46    | Bol005575                   | At2g37050-2                 |          | 2517                 |
| BoLRR48    | Bol028329                   | At4g20140                   | GSO1     | 3617                 |
| BoLRR53    | Bol040377                   | At3g13380                   | BRL3     | 2160                 |

Table S1. Cont.

|         |           |             |        |      |
|---------|-----------|-------------|--------|------|
| BoLRR54 | BoI017009 | At5g61480   | TDR    | 2625 |
| BoLRR55 | BoI004350 | At5g65700   | PXL2   | 2984 |
| BoLRR56 | BoI012386 | At5g44700-1 | GSO2-1 | 3671 |
| BoLRR57 | BoI006354 | At5g44700-2 | GSO2-2 | 3789 |
| BoLRR58 | BoI043860 | At5g07180   | ERL1   | 2477 |
| BoLRR59 | BoI042730 | At3g25560   | NIK2   | 1733 |
| BoLRR60 | BoI025602 | At4g08850   |        | 3077 |
| BoLRR61 | BoI019648 | At4g28650   | PXL2   | 3035 |
| BoLRR63 | BoI024650 | At5g10290   |        | 1812 |
| BoLRR65 | BoI012709 | At5g25930-2 |        | 2732 |
| BoLRR67 | BoI002765 | At5g49660   |        | 2783 |
| BoLRR70 | BoI003055 | At5g63710   |        | 1653 |
| BoLRR71 | BoI040608 | At5g63930   |        | 2912 |
| BoLRR72 | BoI009214 | At5g65240   |        | 1817 |
| BoLRR73 | BoI041836 | At1g28440-1 | HSL1   | 2987 |
| BoLRR74 | BoI015744 | At1g28440-2 | HSL1-2 | 2629 |

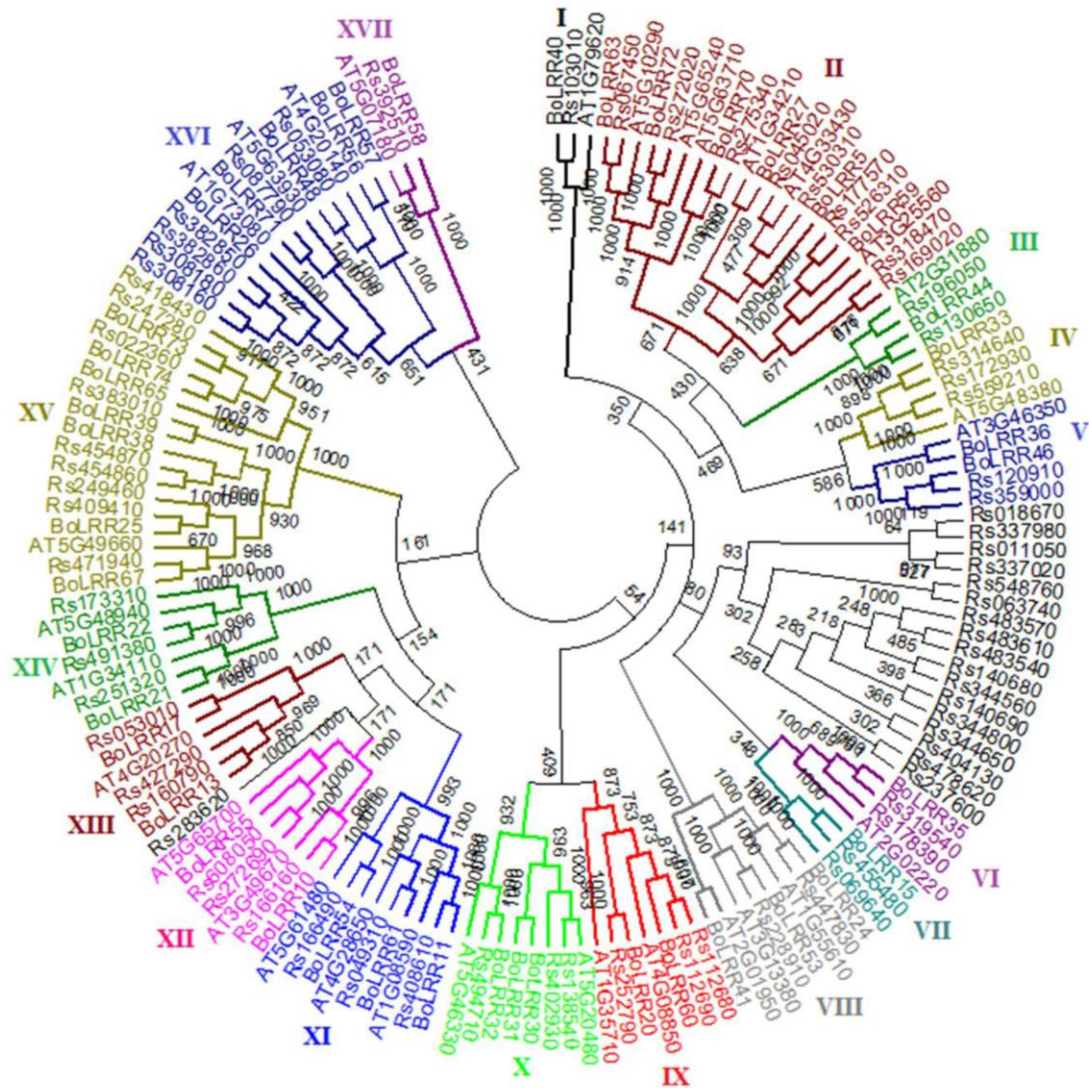

Figure S1. Comparative phylogeny analysis of LRR-RLK genes of *A. thaliana*, *B. oleracea*, and *R. sativus*
